# Supplementary material for: Read-level genotyping of short tandem repeats using long reads and single-nucleotide variation with STRkit
Source: HighWire-hosted journal article supplement (doi:10.1101/gr.280766.125), 2026-01-15
Supplement: Supplemental_Code.zip [file feature_analysis.xlsx]

## Sheet: Sheet1
Feature	STRkit	LongTR	TRGT	Straglr	STRdust	Notes
Copy number output	✓	-	✓	✓	-
Allele size confidence intervals	✓	-	✓	✓	-
Allele consensus sequence output	✓	✓	✓	-	✓
Beyond read-length genotyping	-	-	-	Partial	-	Straglr can use reads that cover only part of a repeat to support alleles, but does not have a size model which incorporates in-repeat reads like some short-read STR genotypers.
De novo proximate SNV phasing	✓ + output	-	✓	-	-	STRkit and TRGT can use heterozygous SNVs to cluster STR alleles; STRkit can output them to VCF.
Existing phased SNV incorporation	-	✓✓	-	-	-
Haplotagged alignment file support	✓	✓	✓	-	✓	All but Straglr can use phased read data from, e.g., WhatsHap (Martin et al. 2016) to call STRs.
Methylation handling	-	-	✓✓	-	-
ONT read support	✓	✓	Explicitly forbidden	✓	✓	TRGT: theoretically works on ONT data, but forbidden by software license.
Read-level data	✓	-	Partial	✓	✓	STRkit: JSON output with read-level peak ID + sequence data; TRGT: overlapping reads in BAM; Straglr: TSV output with read-level copy numbers; STRdust: read-level sequence output in VCF.
Mendelian inheritance calculation tool	✓✓	-	-	-	-	STRkit includes a tool to output loci which do not respect Mendelian inheritance in a set of trio VCFs.
Free and open-source software license	Yes (GPLv3)	Yes (GPLv2)	-	Yes (GPLv3)	Yes (MIT)	TRGT's license restricts it to be only used with PacBio sequencing data, and the software cannot be forked and subsequently re-distributed.
Multi-threading/processing	✓	-	✓	✓	✓
Pre-built Docker image	✓✓	-	-	-	-	STRkit is available as a pre-built Docker image, which can be incorporated into, e.g., Nextflow pipelines.
